# Supplementary material for: Cloning and Characterization of Drosophila melanogaster Juvenile Hormone Epoxide Hydrolases (JHEH) and Their Promoters
Source: MDPI journal article supplement (doi:10.3390/biom12070991), 2022-07-16
Supplement: s1 [file s1]

**Table S1.** Primers used for sequencing *D. melanogaster* JHEH 1 cDNA

| Primers                    | Primer sequence (5'-3')             | Position                | Amplicon (nt) | <i>t<sub>m</sub></i> (C°) |
|----------------------------|-------------------------------------|-------------------------|---------------|---------------------------|
| DB575 (F)                  | ATGGGTGTCACTGTTAAAATTCT             |                         |               | 62                        |
| DB577 (R)                  | GTGGAGGAAGTGTGTGCGTAACC             | 1-432                   | 432           | 70                        |
| DB576 (F)                  | CTGTGGCGCGAACGCGAGGTG               |                         |               | 77                        |
| DB579 (R)                  | CACAAACAACTGGGCCAAAATT              | 349-864                 | 515           | 65                        |
| DB578 (F)                  | TCGAACATGTGCAACAATTTGAG             |                         |               | 64                        |
| DB580 (R)                  | CTTCGTGAGTCCTCCATCTGGCA             | 787-1080                | 293           | 71                        |
| DB582 (R)                  | GGGAACCCGCTCCAGGTGCAGGT             | 787-1212                | 425           | 79                        |
| DB581 (F)                  | GCCCTGCTGGACAACCTGATGAT             |                         |               | 72                        |
| DB583 (R)                  | CTACAGAGTCTTAATTTTAACT              | 1096-1411               | 315           | 54                        |
| <i>3' RACE</i>             |                                     |                         |               |                           |
| DB577 (R)                  | GTGGAGGAAGTGTGTGCGTAACC             |                         |               | 70                        |
| DB265 (F)                  | GAGTCGGATCGACATCGT(T) <sub>17</sub> | (-) <sup>a</sup> 20-432 | 452           | 67                        |
| <i>5' RACE</i>             |                                     |                         |               |                           |
| DB581 (F)                  | GCCCTGCTGGACAACCTGATGAT             |                         |               | 72                        |
| DB265 (R)                  | GAGTCGGATCGACATCGT(T) <sub>17</sub> | 1096-1470               | 374           | 67                        |
| <i>Northern Blot Probe</i> |                                     |                         |               |                           |
| DB578                      | As shown above                      |                         |               |                           |

<sup>a</sup>JHEH 1 sequence (-1) to (-20) is found in supplementary materials (Figure S2). All the listed primers and directions are found in Figure 1 a. F=forward direction, R=reverse direction.

**Table S2** Primers used for sequencing *D. melanogaster* JHEH 2 cDNA

| Primers                    | Primer sequence (5'-3')             | Position                | Amplicon (nt) | <i>t<sub>m</sub></i> (C°) |
|----------------------------|-------------------------------------|-------------------------|---------------|---------------------------|
| DB584 (F)                  | ATGGCGAACATCTGGCCACGAAT             |                         |               | 72                        |
| DB586 (R)                  | GCTTGGCTTGGCATGAATAAAAT             | 1-432                   | 432           | 64                        |
| DB638 (F)                  | GTCGGAGCTCTGACCATCCTGGTG            |                         |               | 74                        |
| DB586 (R)                  | GCTTGGCTTGGCATGAATAAAAT             | 28-432                  | 404           | 64                        |
| DB585 (F)                  | CCGGAGGAGTACCTCAAGAAGCT             |                         |               | 70                        |
| DB588 (R)                  | CGCATACTCGCTGTCCACAAACC             | 349-864                 | 515           | 71                        |
| DB587 (F)                  | AATAACACCCCTATGGGTCAGTT             |                         |               | 65                        |
| DB590 (R)                  | GCCAGCCTTGGCCTTGATGGGCA             | 787-1215                | 315           | 78                        |
| DB589 (F)                  | GTGATGATCTATTATGTGACCAA             |                         |               | 59                        |
| DB 591 (R)                 | TTATGAGAAATTGGCTTTCTAGA             | 1096-1388               | 292           | 58                        |
| <i>3' RACE</i>             |                                     |                         |               |                           |
| DB265 (F)                  | GAGTCGGATCGACATCGT(T) <sub>17</sub> |                         |               | 67                        |
| DB586 (R)                  | GCTTGGCTTGGCATGAATAAAAT             | (-)30 <sup>b</sup> -462 | 492           | 64                        |
| <i>5' RACE</i>             |                                     |                         |               |                           |
| DB653 (F)                  | TCCATTACCACCTCCATGCGTCTGTAT         | 1119-1532               | 413           | 71                        |
| DB654 (F)                  | TCCGAATCAATGGTTGCCTCGCA             | 1146-1532               | 386           | 72                        |
| DB265 (R)                  | GAGTCGGATCGACATCGT(T) <sub>17</sub> |                         |               | 67                        |
| <i>Northern Blot Probe</i> |                                     |                         |               |                           |
| DB587                      | As shown above                      |                         |               |                           |

<sup>b</sup>JHEH 2 sequence (-1) to (-30) is found in supplementary materials (Figure S3). All the listed primers and directions are found in Figure 1 b. F=forward direction, R=reverse direction.

**Table S3.** Primers used for sequencing *D. melanogaster* JHEH 3 cDNA

| Primers                    | Primer sequence (5'-3')             | Position   | Amplicon (nt) | <i>t<sub>m</sub></i> (C°) |
|----------------------------|-------------------------------------|------------|---------------|---------------------------|
| DB592 (F)                  | ATGAAGTGCCTGATAGTGTGG               |            |               | 65                        |
| DB594 (R)                  | TACCTTTTCGTGAATATAGTGAA             | 1-432      | 432           | 58                        |
| DB593 (F)                  | GAGCGCCAGGAGCTGTTCAACTC             |            |               | 73                        |
| DB596 (R)                  | AAAGAATCTGGACGGCAAGTACT             | 349-864    | 515           | 66                        |
| DB595 (F)                  | CTGCACACGCCACTGGCCATTCT             |            |               | 75                        |
| DB598 (R)                  | CATGGGAACCGGGGACTGCACAC             | 787-1212   | 425           | 75                        |
| DB597 (F)                  | CTGATGGTCTACTATCTGACGAA             |            |               | 63                        |
| DB599 (R)                  | TTATTTTCTCTTCTCGCCGTGTA             | 1096-1404  | 308           | 63                        |
| <i>3' RACE</i>             |                                     |            |               |                           |
| DB265 (F)                  | GAGTCGGATCGACATCGT(T) <sub>17</sub> |            |               | 67                        |
| DB594 (R)                  | TACCTTTTCGTGAATATAGTGAA             | (-)10°-432 | 442           | 58                        |
| <i>5' RACE</i>             |                                     |            |               |                           |
| DB597 (F)                  | CTGATGGTCTACTATCTGACGAA             | 1096-1441  | 345           | 63                        |
| DB651 (F)                  | TCGGCCACGACGGCGGCTCGTTTT            | 1119-1441  | 322           | 81                        |
| DB652 (F)                  | TACCTGGAGAACGTGTCCAAGACG            | 1143-1441  | 298           | 71                        |
| DB 265 (R)                 | GAGTCGGATCGACATCGT(T) <sub>17</sub> |            |               | 67                        |
| <i>Northern Blot Probe</i> |                                     |            |               |                           |
| DB595                      | As shown above                      |            |               |                           |

JHEH 3 sequence (-1) to (-10) is found in supplementary materials (Figure S4). All the listed primers and directions are found in Figure 1 c. F=forward direction, R=reverse direction.

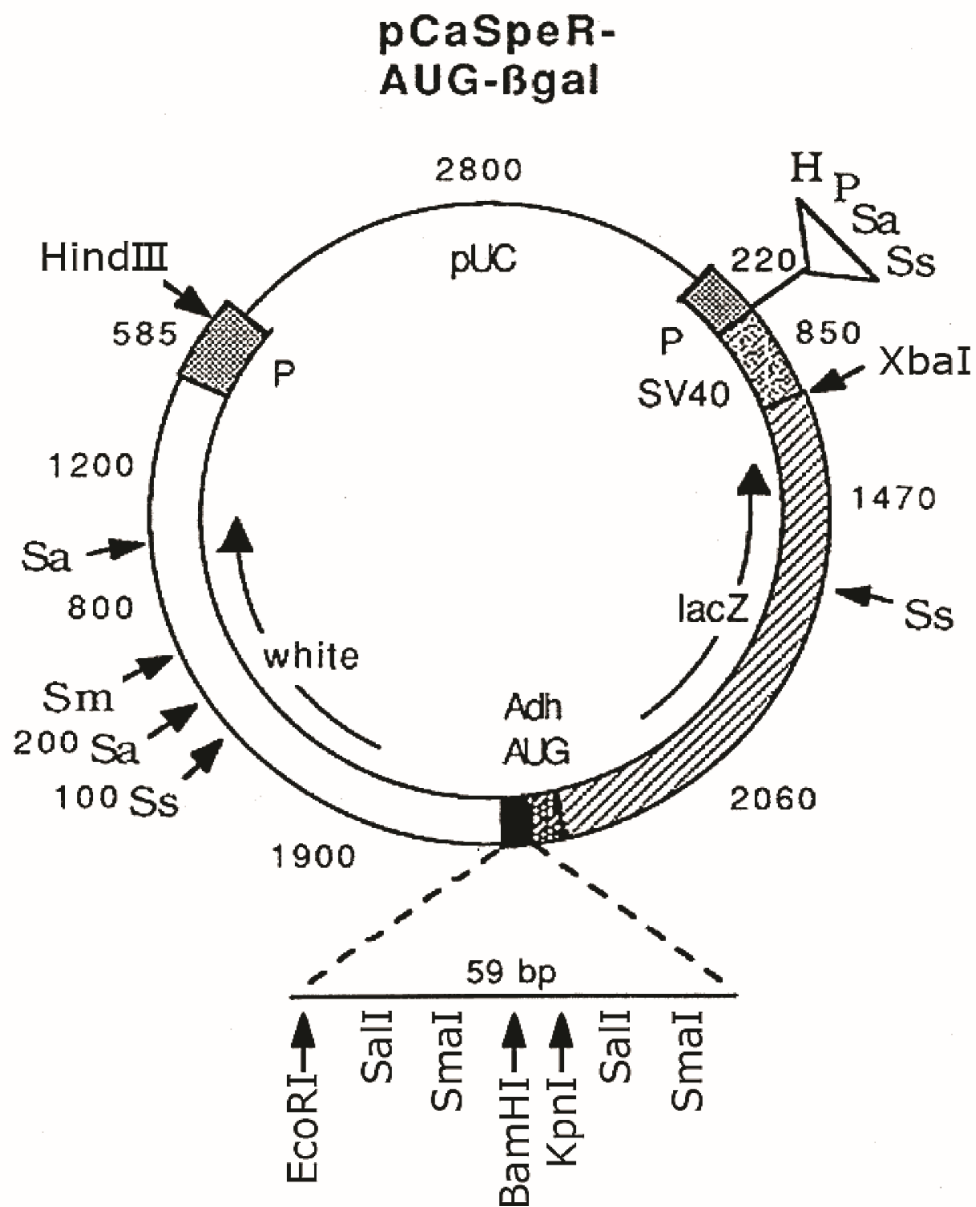

**Figure S1.** Plasmid pCaSpeR-AUG-bgal with unique cloning sites of *EcoRI*, *BamHI* and *KpnI* at the multiple cloning site denoted by arrows behind AUG start signal allowing to test promoter transcriptional activity by cloning at the multiple cloning site behind *lacZ* reporter gene. The plasmid is designed for p-element transformation of *D. melanogaster*.

**Table S4.** Primers used for testing *D. melanogaster* JHEH 1 promoter

| Primers   | Primer sequence (5'-3')                       | Amplicon (nt) | <i>t<sub>m</sub></i> (C°) |
|-----------|-----------------------------------------------|---------------|---------------------------|
| DB737 (F) | CCAAGAATT <u>C</u> TTGTTTATCATTAGTTATAGAAGTCC |               | 64                        |
| DB738 (R) | AATTGGATCCCTGTTTCCTATCAGGCGGTTCC              | 846           | 75                        |
| DB792 (F) | CCAAGAATTCTCATAAGTATATGTACATATATGAT           |               | 61                        |
| DB738 (R) | AATTGGATCCCTGTTTCCTATCAGGCGGTTCC              | 646           | 75                        |
| DB795 (F) | CCAAGAATTCTGTTCAGTCTACCCCAGTGTAGTTC           |               | 72                        |
| DB738 (R) | AATTGGATCCCTGTTTCCTATCAGGCGGTTCC              | 446           | 75                        |
| DB817 (F) | CCAAGAATTCTCCGGTCTTTACCCG                     |               | 71                        |
| DB738 (R) | AATTGGATCCCTGTTTCCTATCAGGCGGTTCC              | 305           | 75                        |
| DB828 (F) | CCAAGAATTCAATAAACAAACAAGCCGATT                |               | 66                        |
| DB738 (R) | AATTGGATCCCTGTTTCCTATCAGGCGGTTCC              | 245           | 75                        |
| DB847 (F) | CCAAGAATTCAATAAACAAA CAAGCCGATT               |               | 66                        |
| DB738 (R) | AATTGGATCCCTGTTTCCTATCAGGCGGTTCC              | 146           | 75                        |

All forward primers (F) have an underlined *Eco*RI cleavage site and all reverse primers (R) have an underlined *Bam*HI cleavage site for cloning the different JHEH 1 promoter amplicons into pCasperR-AUG-bgal. Full sequence of JHEH 1 promoter is found in supplementary material (Figure S2). F=forward direction, R=reverse direction.

TTGTTTATCA TTAGTTATAG AAGTCCATTG TACATTTTCA TCGTGATTCT TGAAAGAAAC -786  
 → **DB737**  
 GGTTATGTTT GTTGCAAAAA TTAAATCAAA TCGACTTGGT GATTGTATTT GCCTTATCTG -726  
 CTTTGA AAAC CGAAAGTTGA AGAGTTTTTT GTTTGGAATA CACGAGTGGC GAGCAAAAGG -666  
 GCAGTGTGTG GTGTTTGCTT TCATAAGTAT ATGTACATAT ATGATATATC TAAGCTCGGA -606  
 → **DB792**  
 ACGATGTTAC GTAAC TTATT CCCATGGGCT ATAGTCGACA TTGGTGTACC CTTTATAAGA -546  
 AATCATGTAA TATGTTGAAT TATTACTTAA CTAAATGACA GTAGAGTGAT ATTAACCAA -486  
 ATGAACATCA AATTTTACTT GGCAACAAAG ATCTCACACA TGTTCACTCT ACCCCAGTGT -426  
 → **DB795**  
 AGTTCGAAAA TAAGGGGTAT TTTT TAGCTA ACCTGGTAGC CCAGCTGCGT CGCAAAATAT -366  
 ACAAAACAA TTCGCGGGTC TCATTCTTTA TACATATAGT ACATACATAC ATACATACCC -306  
 CTCCGGTCTT TACCCGTAAA AGCTTCAAAC CAAAACCGG CATGTAAGCT TTGTTGAGTA -246  
 → **DB817**  
 AATAAACAAA CAAGCCGATT CATTCGAGTC ATCCCCGATG TGGAAAGCCG C TACTCCGTC -186  
 → **DB828**  
 TCAGTGGAGT CGAGTCCAAA GTAAACCCGC GATAAGCCCC AACTGATCGG CGTAGGGTGG -126  
 → **DB847**  
 TCACTCAAAG TCGCTTATCA TCATGAGCGT CGAAAACGAG AGCTGCGCCC ACGATGATAT -66  
 GG TAGAATCA GTGGAATCGT AGCTGCTATC CGAGACAGTC TGAGT GGAAC CGCTGATAGG -6  
 → **DB738**  
AACAG -1

**Figure S2.** *Jheh1* promoter's sequence (845 bp). Horizontal arrows (pointing right) show the forwards primers and horizontal arrow (pointing left) show the back primer that were used to amplify by PCR promoter's segments that were cloned into pCaSpeR-AUG-bgal and tested for transcriptional activity.

**Table S5.** Primers used for testing *D. melanogaster* JHEH 2 promoter

| Primers   | Primer sequence (5'-3')                              | Amplicon (nt) | <i>t<sub>m</sub></i> (C°) |
|-----------|------------------------------------------------------|---------------|---------------------------|
| DB787 (F) | CCAAGAATT <u>C</u> CATTTTCAGTACCAGGGGTCATAC          |               | 71                        |
| DB740 (R) | AATTGGATC <u>C</u> CTGTGTGTTTATGCTATATTCTTTATATATTC  | 1325          | 65                        |
| DB793 (F) | CCAAGAATTCAATTTGCACAAACTTTGGTAAGGTC                  |               | 70                        |
| DB740 (R) | AATTGGATC <u>C</u> CTGTGTGTTTATGCTATATTCTTTATATATTC  | 850           | 65                        |
| DB796 (F) | CCAAGAATT <u>C</u> CTTTTCGACTACCTTCTGCATAGA          |               | 70                        |
| DB740 (R) | AATTGGATC <u>C</u> CTGTGTGTTTATGCTATATTCTTTATATATTC  | 585           | 65                        |
| DB808 (F) | CCAAGAATT <u>C</u> TTGACCACCTCTGTATATATTAAGG         |               | 67                        |
| DB740 (R) | AATTGGATC <u>C</u> CTGTGTGTTTATGCTATATTCTTTATATATTC  | 455           | 65                        |
| DB848 (F) | CCAAGAATT <u>C</u> GCCAAAAGCTCGCCGAAATT              |               | 73                        |
| DB740 (R) | AATTGGATC <u>C</u> CTGTGTGTTTATGCTATATTCTTTATA TATTC | 245           | 65                        |
| DB860 (F) | CCAAGAATT <u>C</u> AGCTTTTGTTTGCCGGTAGC              |               | 72                        |
| DB740 (R) | AATTGGATC <u>C</u> CTGTGTGTTTATGCTATATTCTTTATATATTC  | 146           | 65                        |

All forward primers (F) have an underlined *Eco*RI cleavage site and all backward primers (B) have an underlined *Bam*HI cleavage site for cloning the different JHEH 2 promoter amplicons into pCasperR-AUG-bgal. Full sequence of JHEH 2 promoter is found in supplementary material (Figure S3). F=forward direction, R=reverse direction.

TTTATGGACT GATGAGTCTG CATTTTCAGTA CCAGGGGTCA TACAGCAAGC ATTTTATGCA -1285  
 → **DB787**  
 TTTGAAAAAT AATCAAAAGC ATTTGGCAGC CCAGCCAACC AATAGATTG GTGGGGGCAC -1225  
 AGTCATGTTT TGGGGATGTC TTTCCTATTA TGGGATTCGG AGACTTGGTA CCGATAGAAG -1165  
 GAACTTTAAA TCAGAACGGA TACCTTCTGA TCTTAAACAA CCATGCTTTT ACGTCTGGAA -1105  
 ATAGACTTTT TCCAACACT GAATGGATTC TTCAGCAGGA CAATGCTCCA TGCCATAAGG -1045  
 GTAGGATACC AACAAAATTT TTAAACGACC TTAATCTGGG CGGTTCTTCC GTGGCCCCC -985  
 CAAAGCCCAG ACCTTAATAT CATTGAAAAC GTTTGGGCTT TTATTAAAAA CTAACGAACT -925  
 ATTGATAAAA ATAGAAAACG AGAGGGAGCC ATCATTGTAA TAGCGGAGAT TTGGTCCAAA -865  
 TTGACATTAG AATTTGCACA AACTTTGGTA AGGTCAATAC CAAAAGACT TCAAGCAGTT -805  
 → **DB793**  
 ATTGATGCCA AAGGTGGTGT TACAAAATAT TAGTATTGTA TTTATATAAA ATAAAAAAAA -745  
 TTCTTATGTT GAAATTAGAT GTTAAGCTGA AATTTACTAA ATTAAGTTGA GTGAAAATAC -685  
 TTTTGAAGCG CAATAAACAT GTGAAAATAC TATTGACAAC TTGCATGCAT ATTTTCTTTT -625  
 GCTTTAAGCT TTGTACTATG AACCGTTATC TTTCGTATTT CTTTTCGACT ACCTTCTGCA -565  
 TAGATCAAGC TAAGCGATAA GAACTATTTT AGGCAAATCG GACAACAACA AGAAGAAATA -505  
 → **DB796**  
 TAACAAAAAG AAGTTGAAGT TTGCAAATAT TGTGCGTTGT GAAAATACTT TTGACCACCT -445  
 CTGTATATAT TAAGGGCTCC GCGTGTGGT AATTCGAGTT CTTAATCATT ATTAATTAAT -385  
 → **DB808**  
 TAAATCAGTA TTTAGTTAAA TGTCATATAA CAATTCATT TTAAGCATGA ATCGTTTCTT -325  
 GTTCACTTTA CTTTCGTGGA TTGATAAATG GAACTGCTTG ATCATCTTCC TAAACTAAAT -265  
 GTAAATTTTA AGTACAAAAA TTGCTCTCAC TCAATTTGTT GCCAAAAGCT CGCCGAAATT -205  
 → **DB848**  
 CTCAAATTAT TTGTCCAATC ATGCTCGCAT TGCATTGCCG TGTGGAATAC GATCCACTTG -145  
 AAATCCACAA GCCAACAAAA AGCTTTTGTT TGCCGGTAGC TTGCGCTTTA CAAATCATTT -85  
 → **DB860**  
 GTGCTCGACG ATCGTAAGCG AGGAGTTGCG CAGTTCGCCG ATCTGTGTAT ATAGAATATA -25  
 → **DB740**  
TAAAGAATAT AGCATAAACA CACA -1



**Figure S3.** *Jheh2* promoter's partial sequence (1325 bp). Horizontal arrows (pointing right) show the forwards primers and horizontal arrow (pointing left) show the back primer that were used to amplify by PCR promoter's segments that were cloned into pCaSpeR-AUG-bgal and tested for transcriptional activity.

**Table S6.** Primers used for testing *D. melanogaster* JHEH 3 promoter

| Primers   | Primer sequence (5'-3')                    | Amplicon (nt) | $t_m$ (C <sup>0</sup> ) |
|-----------|--------------------------------------------|---------------|-------------------------|
| DB786 (F) | GCAAAGGATCCCGTTTCCCATCATTGTTTCTGCCA        |               | 76                      |
| DB742 (R) | AATTGGATCCTGTGTGTTTATGCTATATTCTTTATATATTC  | 1562          | 65                      |
| DB794 (F) | GCAAAGGATCCGTGGCAGAAGGGCTGAGATTTATGA       |               | 77                      |
| DB742 (R) | AATTGGATCCTGTGTGTTTATGCTATATTCTTTATATATTC  | 852           | 65                      |
| DB797 (F) | GCAAAGGATCCGCAATGCACCTTGGGGCTAAGTCTA       |               | 79                      |
| DB742 (R) | AATTGGATCCTGTGTGTTTATGCTATATTCTTTATATATTC  | 627           | 65                      |
| DB809 (F) | GCAAAGGATCCGTATAAAAGTATTATAAAGTAC          |               | 63                      |
| DB742 (R) | AATTGGATCCTGTGTGTTTATGCTATATTCTTTATATATTC  | 452           | 65                      |
| DB829 (F) | GCAAAGGATCCGACCATTATAACCAAGATCA            |               | 70                      |
| DB742 (R) | AATTGGATCCTGTGTGTTTATGCTATATTCTTTATA TATTC | 332           | 65                      |
| DB849 (F) | GCAAAGGATCCGGCGACAGCGAATTTGATA             |               | 76                      |
| DB742 (R) | AATTGGATCCTGTGTGTTTATGCTATATTCTTTATATATTC  | 212           | 65                      |
| DB861 (F) | GCAAAGGATCCTTTATTCCGAATTCGGGTGA            |               | 70                      |
| DB742 (R) | AATTGGATCCTGTGTGTTTATGCTATATTCTTTATATATTC  | 112           | 65                      |

All forward primers (F) have an underlined *Bam*HI cleavage site and all the backward primers (B) have an underlined *Kpn*I cleavage site for cloning the different JHEH 3 promoter amplicons into pCasperR-AUG-bgal. Full sequence of JHEH 3 promoter is found in supplementary material (Figure S4). F=forward direction, R=reverse direction.

CGTTTCCCAT CATGTTTCT GCCACGGCGA ACCAACCACG CCCCATTG GCTGTCTTGC -1502  
 → **DB 786**  
 ATGTTTGGCG GCACTTTTGT GGTTTTTTTT ATCGAGTCTC CTGCCCCCTT GAGTCCTTCG -1442  
 ATATAGTTGC ATGTCGACAG CATTATTGGT GCCCTTACAA TTTATGCGAA TTATCCCCTA -1382  
 CCTTTTATGC ACCCAGAAAT AGAAATGTGT AAAATTTAGA CAAAATATTA CCAAGTCTAT -1322  
 GCATATATTT GCGATGGGTT TCTATTTTAC AATTTTATC TAATATTTTC AGTGACAAT -1262  
 GTCGCCTGCT AACCTCTCGC AGTTCACGCT CTCTATTAC TTGGCTTCAT GGTCTTCGAG -1202  
 CACTAACATT CTTCTACAAC ATCGACGATG TCATTATCCT CCATGGCCAA GGAGTCAAAT -1142  
 GTGTCTCCT CCTGGATTTT CTCACCATCG AAGGCCAGGA TCAGAGACTC AGTAGCAACT -1082  
 CCAAATGCCT GGGCATATTT TTGCCTAAGA AGTGCGCCA AAGGTTGATC CGTTCTCACA -1022  
 TGGCACCGCA GTTTAGGTAG ATTTGAGGAT AGAAGCCAAA TGGTTTTGCT TTGATTGGCC -962  
 ATTCTATTTT ACATTAGAAT TACTAGGAGT GTATTTAGAT AGTGATAGGT GCCACGTGGC -902  
 CTTCTGATCG GCCGACTTCA TTTCATTCAT TTTTGGAGC CACATCATCA GTGGCAGAAG -842  
 GGCTGAGATT TATGATCAGT TGCCGGCGTA GCGCTTACCA ATAAATAAGT TCGATAAGAT -782  
 → **DB 794**  
 AGTGGTGGCG AATAAGTAGC TGGGACTATT CTCAAGTCAC CATCGCACTT GTCTCATATG -722  
 GTACACACGT ATGGGTCACC CTATCTCGCT CGGAAATCAA TGGGCTATTC AAGGTGCAGA -662  
 CGCGGGCAAG TAACACAGTA CCAGGCAGAC TAACCGCAAT GCACCTTGGG GCTAAGTCTA -602  
 → **DB 797**  
 TTATAAAATG CTGGAAATAG AAAATAATGA AAAAAATAT ATATACTTCC TAAATACCCT -542  
 TTGGTTAGGG AATTGGTATT CCTAAATACC CTTAGATAGG CAAGCTATCT AACTATCTAA -482  
 TTATATATTA TAAGTACAAA AGTACAAAAA GTATAAAAGT ATTATAAAGT AAAAAATTT -422  
 → **DB 809**  
 CATTATAAAG TGCAAAGCTT TAACCACATT TAAATATATT TATACTTTAT ACTTAATTTT -362  
 CCAAGCCCAT TAACCTTTGA GCTGCGAGCA GACCATTATA ACCAAGATCA AGCAAAGATC -302  
 → **DB 829**  
 AATTGACAG ATCATATTGT GAACCACTGT GCACGATAGC CAGCGCTATC TAAACGAATT -242  
 TATAAATATT ATACGAACAT ATACTATAAC GGCGACAGCG AATTTCGATA GAGCTTTGCG -182  
 → **DB 849**  
 AGACAATTCG GGAATGAGT ATATGCGCCG GCAGTCAGTT CTTAAGCGGC TTTCTGGTTG -122  
 CACGGTCGTG TTTATTCCGA ATTCGGGTTA GGAATCACAA ACCATTATCT CTTCTGGGAG -62  
 → **DB 861**  
 GTGTACGAGG TGGCTAATTT AAATTCATAA CGAGGGGGAG CTAATTGCGC CTGTGGCCAG -2  
 → **DB 742** ← -1

A

**Figure S4.** *Jheh3* promoter's sequence (1562 bp). Horizontal arrows (pointing right) show the forwards primers and horizontal arrow (pointing left) show the back primer that were used to amplify by PCR promoter's segments that were cloned into pCaSpeR-AUG-bgal and tested for transcriptional activity.

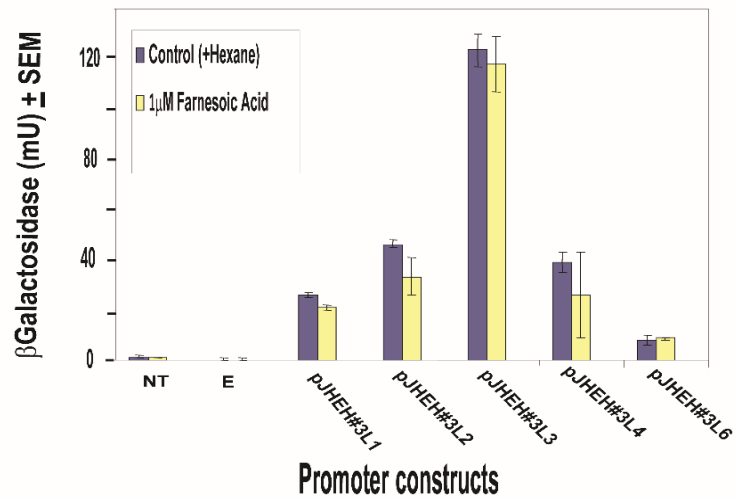

**Figure S5.** Effect of farnesic acid 1 mM on transcriptional activity of transformed D.Mel2 cells with different length *jheh3* promoter constructs (yellow bars). Controls were treated with hexane (magenta bars). Non transformed cells (NT), cells transformed with empty plasmid (E). See Figure 7 for promoter's sequence lengths.
